# Supplementary material for: Immobilization of Ag(0) nanoparticles on quaternary ammonium functionalized polyacrylonitrile fiber as a highly active catalyst for 4-nitrophenol reduction
Source: Royal Society of Chemistry journal article supplement (doi:10.1039/d1ra07321d), 2022-01-01
Supplement: d1ra07321d1.pdf [file d1ra07321d1.pdf]

# **Immobilization of Ag(0) Nanoparticles on Quaternary Ammonium Functionalized Polyacrylonitrile Fiber as Highly Active Catalyst for 4-nitrophenol Reduction**

*Jian Xiao<sup>a</sup>, Zhiying Wu<sup>a</sup>, Kunlang Li<sup>a</sup>, Zibo Zhao<sup>a</sup>, Chunyan Liu<sup>\*a</sup>*

a. Department of Chemistry, College of Pharmacy, North China University of Science and Technology, Tang Shan, 300072, P. R. China.

\* Corresponding author. [chunyanliu@ncst.edu.cn](mailto:chunyanliu@ncst.edu.cn).

## **1. Reagents and instruments**

Commercially available polyacrylonitrile fiber (PANF, the number average molecular weight of the spinning solution is 53000 to 106000, with 93% acrylonitrile, 6.5% methyl acrylate and 0.4%-0.5% sodium styrene sulfonate as the monomers) was cut into 10 cm segments and stored in a desiccator at 60 °C before use. The chemicals of amines, AgNO<sub>3</sub>, organic solvents, halohydrocarbons, NH<sub>2</sub>NH<sub>2</sub>(80% aq), 4-NP, NaOH and hydrochloric acid were purchased commercially. Additionally, water is deionized.

The model of rotary evaporator is EYELA N-1300 (Japan). The weights of fibers and chemicals were tested by the electronic analytical balance BSA124S (Sartorius

Company, Germany). The mechanical properties of fibers were determined by electronic single fiber strength tester YG(B)001A (Wenzhou Textile Instrument Company, China). The fourier transform infrared spectra (FT-IR) of original and functionalized fibers were detected by the AVATAR360 FTIR spectrometer (Thermo Nicolet). The C, H and N contents of fibers were recorded by Elementar Vario MACRO cube (Germany). The XRD spectra of fibers were measured by the D/MAX-2500 X-ray diffractometer (Rigaku Corporation). The X-ray photoelectron spectra (XPS) of PANF-supported Ag(0) nanoparticle catalysts were detected by the PH1600 spectrometer (PERKIN ELMER). The micro physical morphology of fibers were determined by scanning electron microscope (SEM) (Hitachi, model S-4800). The size of Ag(0) nanoparticle in fiber catalyst was measured by transmission electron microscope (TEM) (model FEI Tecnai G2 F20). The thermal stabilities of fibers were measured with TA409PC TGA/DSC simultaneous thermal analyzer (Netzsch company, Germany). The concentrations of 4-NP were detected by the UV-visible spectrophotometer (Beijing Puxi General Instrument Co., Ltd., China).

## **2. Experimental**

**Preparation of PAN<sub>TA</sub>F:** The PANF (1 g), 45 mL of *N,N*-dimethyl-1,3-propanediamine and 30 mL of deionized water were added to a single-necked flask and reflux for 5 h. Then, the functionalized fiber was taken out by tweezers and washed with 1 L of 60 °C water until the eluant was neutral, and then dried at 60 °C over night. The functionality of PAN<sub>TA</sub>F determined by acid-base titration is 1.985%.

**Preparation of PAN<sub>PY</sub>F:** The 1.0 g of PANF, 10 mL of deionized water and 10.0 g

of 4-pyridinemethanamine were added to a single-necked flask and reflux for 24 h. Then, the resulting PAN<sub>PY</sub>F fiber was taken out and cleaned with 1 L of 60 °C water until the eluant was neutral, and then the PAN<sub>PY</sub>F was dried overnight at 60 °C. The weight gain and functionality of PAN<sub>PY</sub>F were 10.3% and 0.875 mmol/g, respectively.

**Preparation of PAN<sub>IM</sub>F:** The 1.0 g of PANF , 15 mL of deionized water and 10.0 g *N*-(3-aminopropyl)imidazole were added to a single-necked flask and reflux for 18 h. Then, the resulting PAN<sub>IM</sub>F fiber was taken out and cleaned with 1 L of 60 °C water until the eluant was neutral, and then The PAN<sub>IM</sub>F was dried overnight at 60 °C. The weight gain and functionality of PAN<sub>IM</sub>F were 14.4% and 1.088 mmol/g.

**Preparation of PAN<sub>PY-C4</sub>F:** The 0.2 g of 0.875 mmol/g PAN<sub>PY-C4</sub>F , 20 mL of ethanol (95% aq) and 1.37 g *N*-bromobutane were added to a 50 mL single-necked flask and reflux for 12 h. Then, the resulting PAN<sub>IM</sub>F fiber was taken out and cleaned with 200 mL of 60 °C 50% ethanol aqueous solution until the eluant was neutral, and then The PAN<sub>IM</sub>F was dried overnight at 60 °C. The weight gain and functionality of PAN<sub>IM</sub>F were 13.5% and 0.869 mmol/g.

**Preparation of PAN<sub>IM-C4</sub>F:** The 0.4 g of 1.088 mmol/g PAN<sub>PY-C4</sub>F , 20 mL of ethanol (95% aq) and 7.91 g *N*-bromobutane were added to a 50 mL single-necked flask and reflux for 12 h. Then, the resulting PAN<sub>IM</sub>F fiber was taken out and cleaned with 400 mL of 60 °C 50% ethanol aqueous solution until the eluant was neutral, and then The PAN<sub>IM</sub>F was dried overnight at 60 °C. The weight gain and functionality of PAN<sub>IM</sub>F were 17.1% and 1.064 mmol/g.

**Preparation of PAN<sub>QA-C3</sub>F, PAN<sub>QA-C4</sub>F, PAN<sub>QA-C5</sub>F, PAN<sub>QA-EB</sub>F, PAN<sub>QA-C7</sub>F,**

**PAN<sub>Q-C9</sub>F, PAN<sub>QA-C10</sub>F and PAN<sub>QA-C12</sub>F:** The 1 g of 1.985 mmol/gPAN<sub>TA</sub>F, 7 eq of halogenated hydrocarbon relative to tertiary amine group and 20 mL of ethanol were added to a single-necked flask and reflux for 6 h. Then, the functionalized fiber was taken out by tweezers and washed with 1 L of 60 °C ethanol and water 1:1 mixed solution until the eluant was neutral, and then dried at 60 °C over night.

**Preparation of Ag(I) functionalized fibers:** The 0.2 g of corresponding functionalized fibers and 20-200 mL 5 ppm AgNO<sub>3</sub> (aq) were added to a single-necked flask and reflux for 10 h. Then, the functionalized fiber was taken by tweezers and washed with 200 mL, and then dried at 60 °C over night.

**Preparation of Ag(0)-functionalized PANFs:** The Ag(I)-functionalized PANFs (0.2 g), 1 g of NH<sub>2</sub>NH<sub>2</sub> (80% aq), 30 mL of water were added to a single-necked flask and react for 4 h in room temperature. Then, the functionalized fiber was taken out by tweezers and washed with 200 nL of water until the eluant was neutral, and then dried at 60 °C over night.

#### **General procedure for the PAN<sub>QA-C4</sub>F-Ag(0) catalyzed the reduction of 4-NP**

4-Nitrophenol (4-NP) solution (1 mmol/L, 40 mL), NaBH<sub>4</sub> (50-200 eq) and 0.1-1.5 mol% PAN<sub>QA-C4</sub>F-Ag(0) were added to a glass stopper tube. The reaction was reacted at 15-35 °C temperature for appropriate time according to the color change of solution. After the reaction was finished, HCl solution (10 mL 1 mol/L) was put in the glass stopper so as to fully desorb the 4-NP attached to the fiber. The standard curves of 4-NP with pH=10 was accurately fitted by the UV-visible spectrophotometer. Then, the conversion rate of the reaction was accurately detected by the standard curve method.

### 3. TEM images of PAN<sub>QA-C12</sub>F-Ag(0)

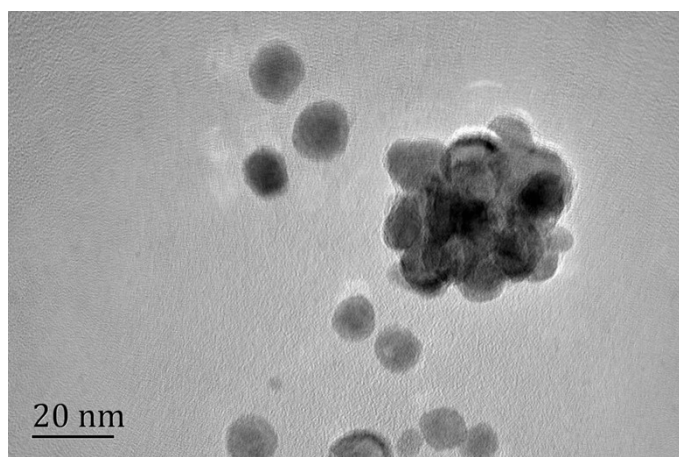

**Fig. S1** TEM images of Ag(0) nanoparticles in PAN<sub>QA-C12</sub>F-Ag(0).

### 4. Standard curves of 4-NP and 4-AP

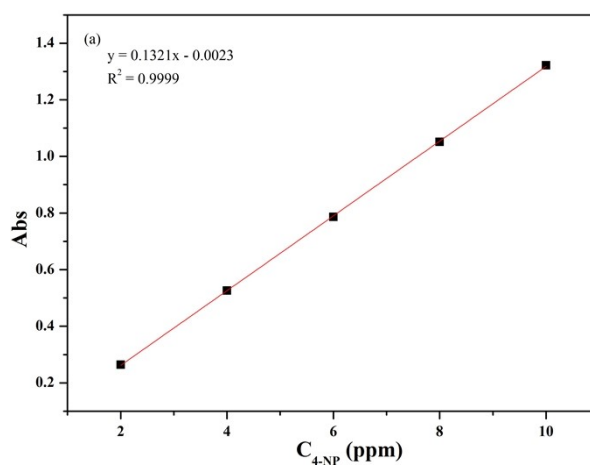

**Fig. S2** The standard curves of (a) 4-NP at pH 10, (b) 4-AP at pH 3.

### 5. Catalysis kinetic of PAN<sub>QA-C4</sub>F-Ag(0)-20

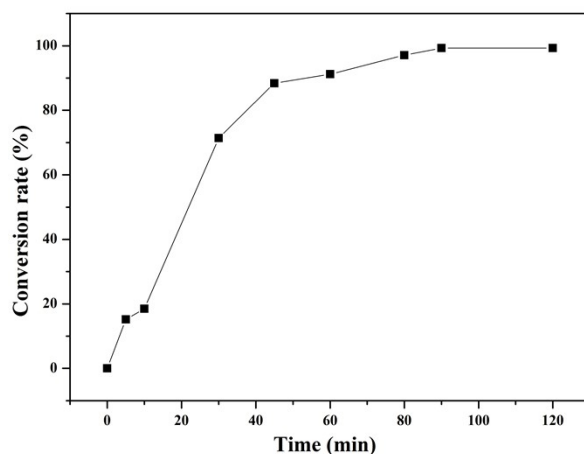

**Fig. S3** Catalysis kinetic of PAN<sub>QA-C4</sub>F-Ag(0)-20 for the reduction of 4-NP at room temperature

## 6. Comparison of PAN<sub>QA-C4</sub>F-Ag(0) with other catalytic systems

**Table S1** Comparison of various catalysts for the Heck reaction of iodobenzene and acrylic acid.

| Entry | Cat./cat. Amount                                            | T (°C) | Time (h) | Conv. (%) | Run <sup>[a]</sup> | Ref.      |
|-------|-------------------------------------------------------------|--------|----------|-----------|--------------------|-----------|
| 1     | Ag@SiO <sub>2</sub> nanoparticles/2 mg (about 0.73 mol%)    | 25 °C  | 120 min  | >95%      | 20                 | [S1]      |
| 2     | Fe <sub>3</sub> O <sub>4</sub> @PS@Ag/2 mg(about 78.4mol%)  | 25 °C  | 3 min    | >99%      | 7                  | [S2]      |
| 3     | PEI-Ni/36.6 mol%                                            | 30 °C  | 5 min    | >99%      | 5                  | [S3]      |
| 4     | TA@Fe <sub>3</sub> O <sub>4</sub> -AgNPs/0.75.9 mol%        | 25 °C  | 3 min    | 98.6%     | 5                  | [S4]      |
| 5     | p(AAm)-CB-Ag composites/1.1 mol%                            | 30 °C  | 80 min   | >99%      | 5                  | [S5]      |
| 6     | CeO <sub>2</sub> /g-C <sub>3</sub> N <sub>4</sub> /Ag/15 mg | 25 °C  | 14 min   | 98.6%     | --                 | [S6]      |
| 7     | PAN <sub>QA-C4</sub> F-Ag(0)/1mol%                          | 25 °C  | 90 min   | >99%      | 20                 | This work |

## Reference

[S1] J. Hou, B. Yu, E. Liu, W. Dong, P. Lu, Z. Wang, V.C. Yang, and J. Gong, Highly efficient, stable and controllable multi-core, rattle-type Ag@SiO<sub>2</sub> catalyst for

the reduction of 4-nitrophenol. RSC Adv. 6 (2016) 95263-95272.

[S2] Y. Wang, P. Gao, Y. Wei, Y. Jin, S. Sun, Z. Wang, and Y. Jiang, Silver nanoparticles decorated magnetic polymer composites ( $\text{Fe}_3\text{O}_4@\text{PS}@\text{Ag}$ ) as highly efficient reusable catalyst for the degradation of 4-nitrophenol and organic dyes. J. Environ. Manage. 278 (2021) 111473.

[S3] S. Demirci, and N. Sahiner, The Use of Metal Nanoparticle-Embedded Poly(ethyleneimine) Composite Microgel in the Reduction of Nitrophenols. Water, Air, & Soil Pollution 226 (2015).

[S4] A. Sangili, M. Annalakshmi, S. Chen, P. Balasubramanian, and M. Sundrarajan, Synthesis of silver nanoparticles decorated on core-shell structured tannic acid-coated iron oxide nanospheres for excellent electrochemical detection and efficient catalytic reduction of hazardous 4-nitrophenol. Composites Part B: Engineering 162 (2019) 33-42.

[S5] N. Sahiner, N. Karakoyun, D. Alpaslan, and N. Aktas, Biochar-Embedded Soft Hydrogel and Their Use in Ag Nanoparticle Preparation and Reduction of 4-Nitro Phenol. International Journal of Polymeric Materials 62 (2013) 590-595.

[S6] D. Pinheiro, K.R. Sunaja Devi, A. Jose, K. Karthik, S. Sugunan, and M. Krishna Mohan, Experimental design for optimization of 4-nitrophenol reduction by green synthesized  $\text{CeO}_2/\text{g-C}_3\text{N}_4/\text{Ag}$  catalyst using response surface methodology. J. Rare Earth. 38 (2020) 1171-1177.
